# Supplementary material for: Informing Behaviour Change: What Sedentary Behaviours Do Families Perform at Home and How Can They Be Targeted?
Source: PubMed Central journal article supplement (PMC6888231; doi:10.3390/ijerph16224565), 2019-11-18
Supplement: ijerph-16-04565-s001.pdf [file ijerph-16-04565-s001.pdf]

**Table S1:** Average (minutes/day) weekday and weekend day sitting behaviours amongst children and parents

|                                                 | Children                          |                                       |             | Parents                           |                                       |              |
|-------------------------------------------------|-----------------------------------|---------------------------------------|-------------|-----------------------------------|---------------------------------------|--------------|
|                                                 | Weekday<br>Mean mins/day<br>(±SD) | Weekend day<br>Mean mins/day<br>(±SD) | p-<br>value | Weekday<br>Mean mins/day<br>(±SD) | Weekend day<br>Mean mins/day<br>(±SD) | p-<br>value  |
| Watching TV/videos/DVDs                         | 53.8 (±52.6)                      | <b>102.1 (±96.9)</b>                  | <0.001      | 82.9 (85.0)                       | <b>109.9 (99.2)</b>                   | <0.001       |
| Using a tablet/smart phone for leisure          | 43.3 (±61.4)                      | <b>76.3 (±100.8)</b>                  | <0.001      | 75.4 (110.0)                      | <b>97.0 (125.9)</b>                   | <0.001       |
| Using the computer/laptop for leisure           | 35.5 (±68.3)                      | <b>67.8 (±110.6)</b>                  | <0.001      | 33.3 (59.8)                       | <b>44.1 (89.9)</b>                    | <0.001       |
| Talking to others (in person or on the phone)   | 35.3 (±71.3)                      | <b>54.3 (±98.5)</b>                   | <0.001      | 45.6 (93.7)                       | <b>57.7 (95.5)</b>                    | <0.001       |
| Playing or listening to music                   | 32.0 (±72.9)                      | <b>52.2 (±105.9)</b>                  | <0.001      | 25.5 (87.0)                       | <b>35.2 (104.6)</b>                   | 0.002        |
| Completing paperwork/writing/studying/ homework | <b>29.5 (±65.7)</b>               | 19.3 (±61.2)                          | <0.001      | 14.4 (41.0)                       | 15.7 (57.5)                           | 0.409        |
| Using the computer/laptop for homework/work     | 25.3 (±58.5)                      | 23.8 (±68.7)                          | 0.634       | <b>54.7 (107.9)</b>               | 40.4 (82.7)                           | <b>0.013</b> |
| Reading for leisure                             | 21.3 (±29.9)                      | <b>30.7 (±45.1)</b>                   | <0.001      | 25.2 (47.8)                       | <b>35.1 (65.1)</b>                    | <0.001       |
| Using game consoles                             | 16.8 (±43.1)                      | <b>40.4 (±83.9)</b>                   | <0.001      | 1.1 (7.9)                         | 3.2 (28.3)                            | <b>0.043</b> |
| Reading for homework/work                       | 18.6 (±41.9)                      | 17.3 (±65.3)                          | 0.551       | 10.3 (31.7)                       | 10.1 (55.7)                           | 0.574        |
| Pretend play                                    | 11.0 (±21.4)                      | <b>23.3 (±44.3)</b>                   | <0.001      | <b>5.6 (62.8)</b>                 | 3.7 (30.7)                            | <b>0.017</b> |
| Doing artwork or crafts                         | 10.7 (±21.3)                      | <b>22.0 (±37.6)</b>                   | <0.001      | 7.8 (29.4)                        | <b>12.1 (46.44)</b>                   | <b>0.002</b> |
| Completing chores                               | 11.7 (±31.9)                      | <b>17.6 (±43.9)</b>                   | <0.001      | 50.0 (100.0)                      | <b>67.9 (126.3)</b>                   | <0.001       |
| Using a tablet/smart phone for homework/work    | 9.2 (±27.0)                       | 5.8 (±22.7)                           | 0.173       | 16.5 (62.8)                       | 12.1 (40.0)                           | 0.893        |
| Preparing and cooking food                      | 3.8 (±12.4)                       | <b>5.1 (±12.1)</b>                    | <0.001      | 27.0 (71.7)                       | <b>30.0 (70.1)</b>                    | <0.001       |
| Total sitting behaviours                        | 350.2 (±246.2)                    | <b>580.1 (380)</b>                    | <0.001      | 459.1 (461.3)                     | <b>598.2 (711.1)</b>                  | <0.001       |
| Total screen-based sitting behaviours           | 173.9 (±142.9)                    | <b>318.5 (±241.6)</b>                 | <0.001      | 264.6 (250.4)                     | <b>322.0 (300.9)</b>                  | <0.001       |
| Total non-screen-based sitting behaviours       | 167.8 (±159.1)                    | <b>249.7 (±221.8)</b>                 | <0.001      | 197.0 (287.3)                     | <b>263.1 (447.6)</b>                  | <0.001       |

Differences between weekdays and weekend days examined by paired samples t-test, significant differences in bold.
